# Supplementary material for: A deep-red fluorophore based on naphthothiadiazole as emitter with hybridized local and charge transfer and ambipolar transporting properties for electroluminescent devices
Source: publisher site journal article supplement (doi:10.3762/bjoc.19.122), 2023-11-03
Supplement: Additional file 1 [file 1860-5397-19-122-S1.pdf]

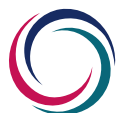

## Supporting Information

for

### **A deep-red fluorophore based on naphthothiadiazole as emitter with hybridized local and charge transfer and ambipolar transporting properties for electroluminescent devices**

Suang Siri Arunlimsawat, Patteera Funchien, Pongsakorn Chasing, Atthapon Saenubol, Taweesak Sudyoasuk and Vinich Promarak

*Beilstein J. Org. Chem.* **2023**, *19*, 1664–1676. doi:10.3762/bjoc.19.122

### **Energy diagram of singlet and triplet excited states estimated by CAM-B3LYP/6-31G(d,p) calculations and copies of $^1\text{H}$ NMR, $^{13}\text{C}$ NMR, and HRMS spectra of the synthesized compounds**

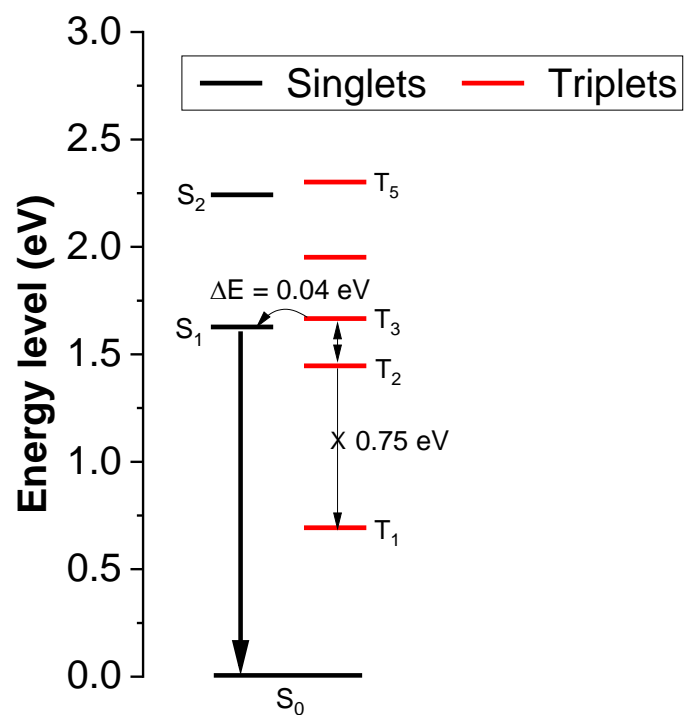

**Figure S1:** The energy diagram of singlet and triplet excited states of the compound estimated by CAM-B3LYP/6-31G(d,p) calculations.

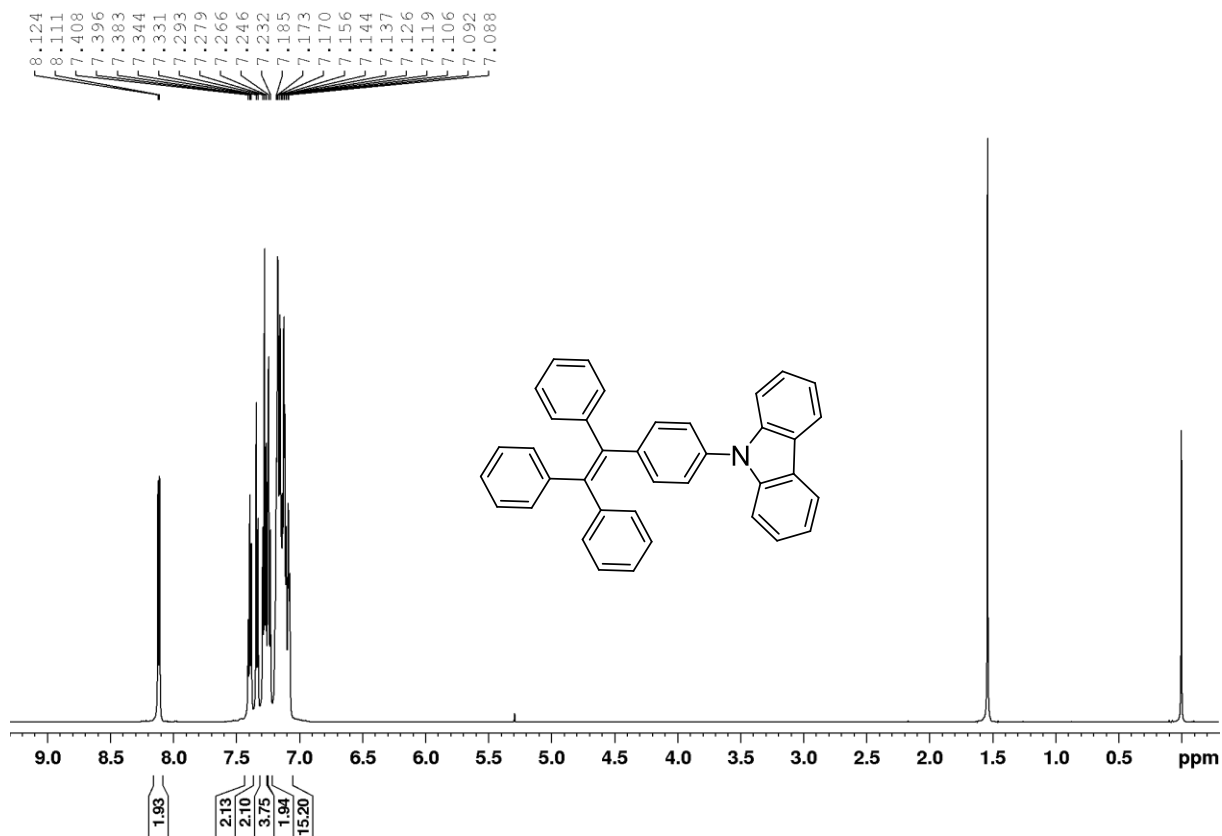

**Figure S2:** <sup>1</sup>H NMR spectrum of **2** in CDCl<sub>3</sub> (600 MHz) @ 25 °C.

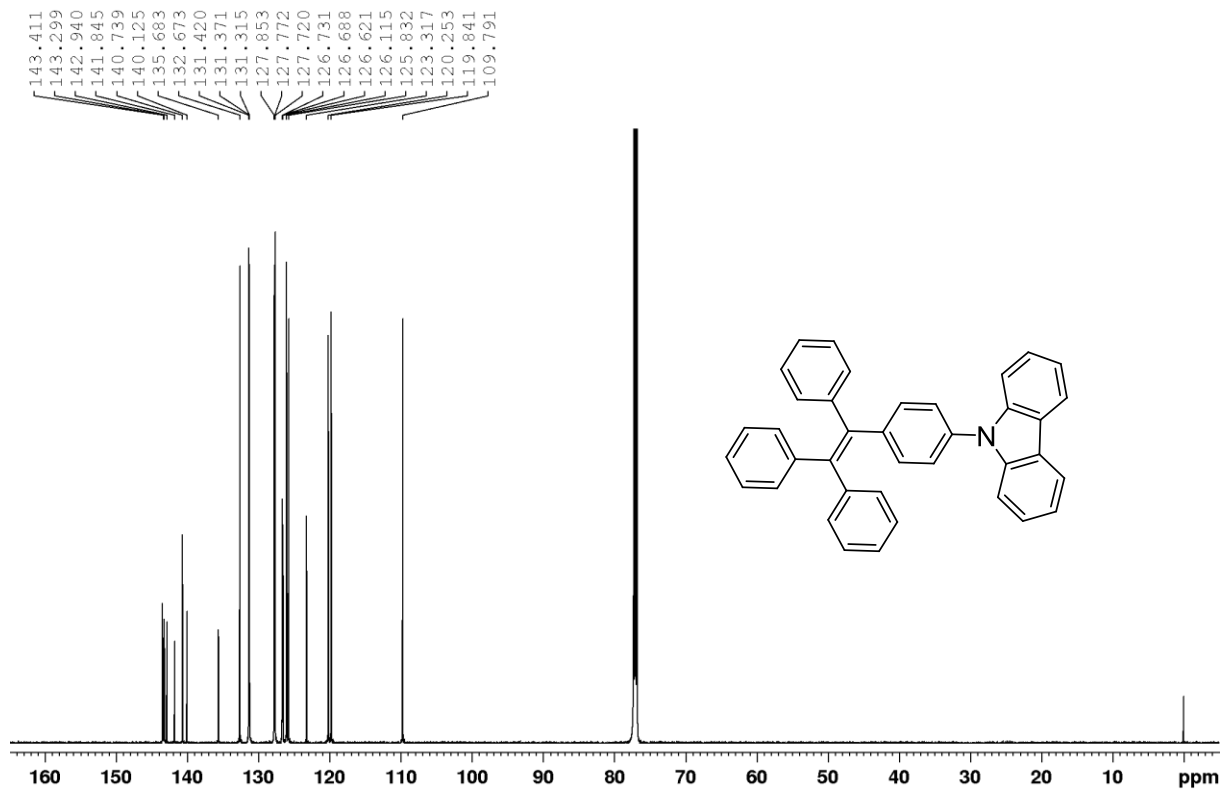

**Figure S3:** <sup>13</sup>C NMR spectrum of **2** in CDCl<sub>3</sub> (151 MHz) @ 25 °C.

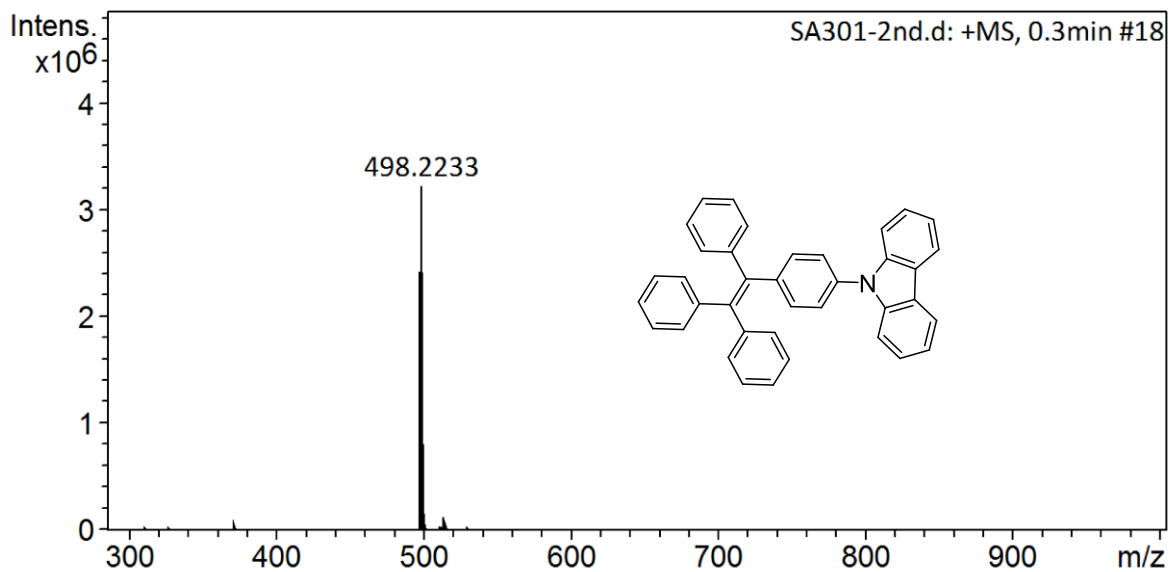

**Figure S4:** APCI-TOF mass spectrum  $[M + H]^+$  of **2**.

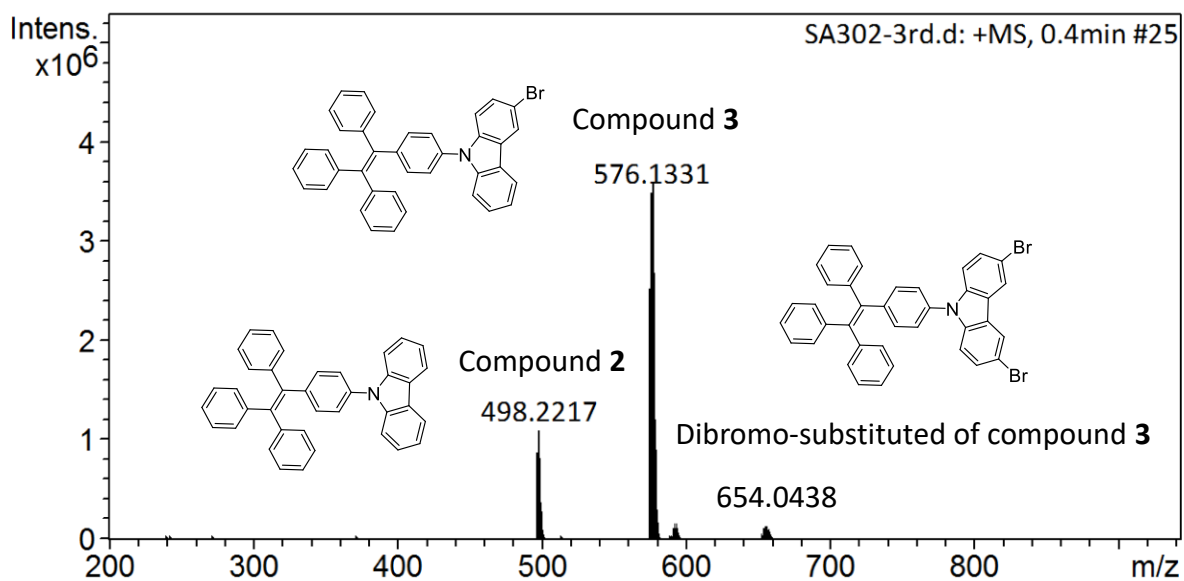

**Figure S5:** APCI-TOF mass spectrum  $[M + H]^+$  of the crude product mixture from the NBS bromination in the synthesis of compound **3**.

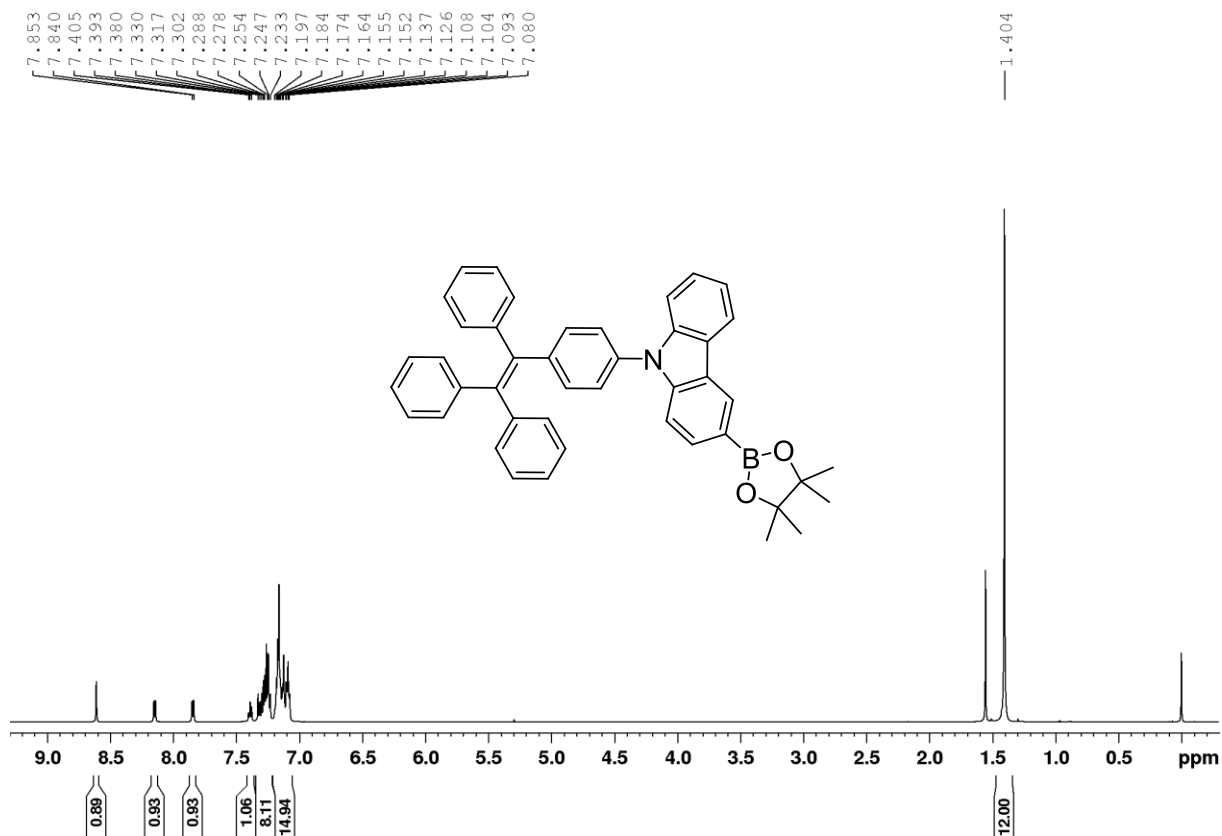

**Figure S6:** <sup>1</sup>H NMR spectrum of **3** in CDCl<sub>3</sub> (600 MHz) @ 25 °C.

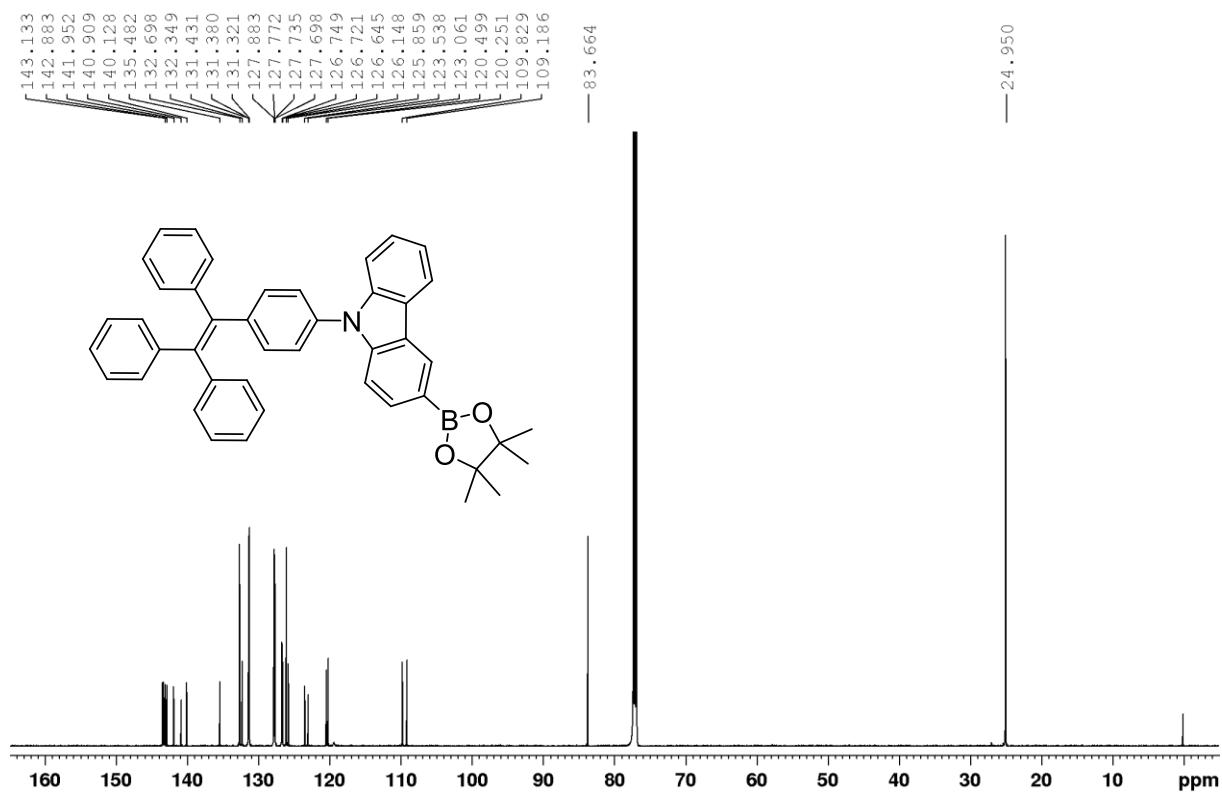

**Figure S7:** <sup>13</sup>C NMR spectrum of **3** in CDCl<sub>3</sub> (151 MHz) @ 25 °C.

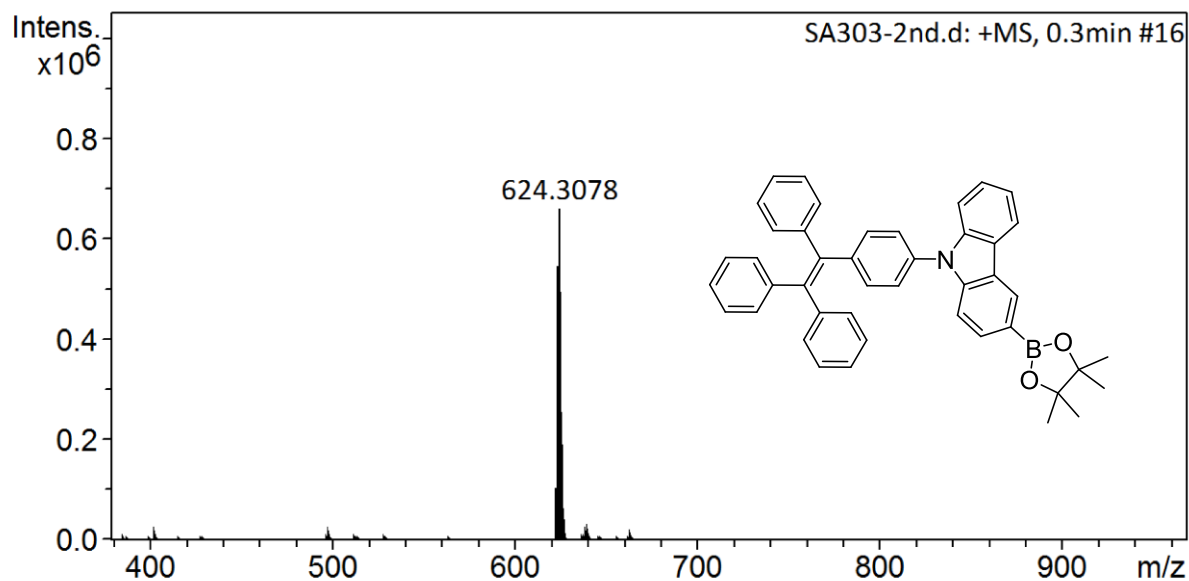

**Figure S8:** APCI-TOF mass spectrum  $[M + H]^+$  of **3**.

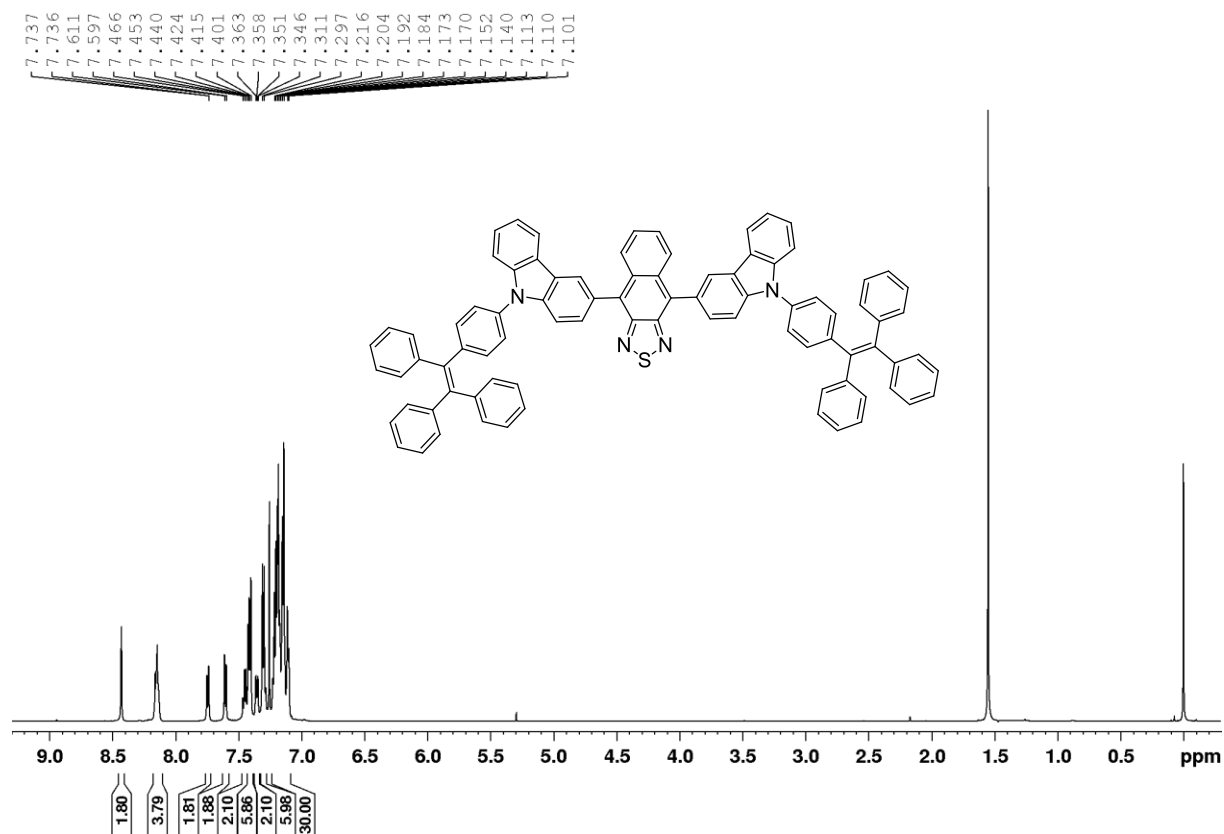

**Figure S9:**  $^1\text{H}$  NMR spectrum of **TPECNz** in  $\text{CDCl}_3$  (600 MHz) @ 25 °C.
